# Supplementary material
Source: publisher figshare collection journal article supplement (https://gsajournals.figshare.com/ndownloader/files/21214974)
Supplement: Supplementary file 1 [file 21214974]

"Table S6. Select lead SNPs with association regions containing less than 5 coding genes. Credible set analysis was performed to define the boundaries of the locus (r2 threshold = 0.8, posterior probability threshold = 0.99). Genes contained in and/or immediately downstream of the credible set interval were included as associated genes.",,,,,,,,,,,
,,,,,,,,,,,
,,,,,,,,,,,
Generation,Genotypes,Phenotype,chr,lead snp,pos,P-value,"""-LOG10""",af,beta,se,Associated genes
F34,array,Quadriceps femoris muscle weight (mg),1,chr1:22249888,22249888,5.69E-06,5.245,0.596,0.193,0.042,"Kcnq5, Rims1"
F34,array,Quadriceps femoris muscle weight (mg),4,chr4:54609724,54609724,1.29E-05,4.889,0.707,0.199,0.045,"Zfp462, Rad23b"
F34,array,Extensor digitorum longus muscle weight (mg),4,chr4:54609724,54609724,1.54E-06,5.812,0.553,0.223,0.046,"Zfp462, Rad23b"
F34,array,Gastrocnemius muscle weight (mg),6,chr6:80659015,80659015,1.69E-05,4.772,0.484,0.178,0.041,"Lrrtm4, Gcfc2"
F34,array,Quadriceps femoris muscle weight (mg),6,chr6:81465256,81465256,1.41E-05,4.851,0.553,0.19,0.043,"Lrrtm4, Gcfc2"
F34,array,"Coat color, albino",7,chr7:87689885,87689885,3.76E-109,108.425,0.568,0.584,0.019,Tyr
F34,array,"Locomotor test day 2, total distance travelled in 30min (cm)",8,chr8:17159295,17159295,7.15E-06,5.146,0.827,-772,170,Csmd1
F34,array,Quadriceps femoris muscle weight (mg),8,chr8:128443469,128443469,1.05E-07,6.979,0.496,0.223,0.041,"Nrp1, Itgb1, Ccdc7b"
F34,array,Retic parameters concentration of hemoglobin in reticulocytes (pg),8,chr8:128607127,128607127,1.83E-05,4.738,0.414,0.27,0.063,"Nrp1, Itgb1, Ccdc7b"
F34,array,"Retic parameters concentration of hemoglobin in reticulocytes, repeat  (pg)",8,chr8:128607127,128607127,3.50E-06,5.456,0.349,-0.345,0.074,"Nrp1, Itgb1, Ccdc7b"
F34,array,Routine CBC cell hemoglobin concentration mean (g/dL),15,chr15:29893263,29893263,3.86E-06,5.413,0.483,0.293,0.063,Ctnnd2
F34,array,Routine CBC hemoglobin distribution width (g/dL),16,chr16:70166221,70166221,2.01E-05,4.697,0.511,0.285,0.066,"Gbe1, Speer2, Robo1"
F34,GBS,Routine CBC hematocrit (%),1,chr1:41580321,41580321,1.37E-05,4.863,0.724,-0.308,0.07,"Mfsd9, Pou3f3,  930448I06Rik"
F34,GBS,Tibia length (cm),1,chr1:77255381,77255381,1.39E-05,4.857,0.433,-0.37,0.084,"Epha4, Sgpp2, Pax3"
F34,GBS,Routine CBC red blood cell count (x10^6 cells/uL blood),1,chr1:148977286,148977286,1.30E-06,5.886,0.526,-0.305,0.063,"Bring3, Pla2g4a"
F34,GBS,Routine CBC hemoglobin (g/dL),1,chr1:148977286,148977286,1.88E-06,5.726,0.522,-0.346,0.072,"Brinp3, Pla2g4a"
F34,GBS,Iron content in spleen (ug/kg),2,chr2:95390277,95390277,4.96E-06,5.305,0.528,0.249,0.054,"Lrrc4c, Api5, Alkbh3, Hsd17b12"
F34,GBS,Routine CBC cell hemoglobin concentration mean (g/dL),2,chr2:128412068,128412068,7.07E-06,5.151,0.449,0.303,0.066,"Bcl2l11, Spdye4c, Anapc1, Mertk"
F34,GBS,Iron content in spleen (ug/kg),3,chr3:52749950,52749950,9.06E-06,5.043,0.508,0.255,0.057,"Cog6, Lhfp"
F34,GBS,Iron content in spleen z score,3,chr3:52749950,52749950,1.31E-05,4.883,0.508,0.268,0.061,"Cog6, Lhfp"
F34,GBS,Gastrocnemius muscle weight (mg),6,chr6:80767933,80767933,2.68E-06,5.572,0.483,0.192,0.041,Lrrtm4
F34,GBS,Quadriceps femoris muscle weight (mg),6,chr6:81267890,81267890,6.35E-07,6.197,0.597,0.214,0.042,"Lrrtm4, Gcfc2"
F34,GBS,"Body weight, day 1",6,chr6:81405109,81405109,6.22E-06,5.206,0.497,0.206,0.045,"Lrrtm4, Gcfc2"
F34,GBS,Quadriceps femoris muscle weight (mg),6,chr6:93488270,93488270,3.28E-08,7.484,0.497,0.23,0.041,"Prickle2, Adamts9, Magi1"
F34,GBS,"Coat color, albino",7,chr7:87642045,87642045,5.00E-106,105.301,0.432,-0.581,0.019,Tyr
F34,GBS,Routine CBC red blood cell distribution width (%),7,chr7:115540157,115540157,1.04E-06,5.983,0.379,-0.335,0.068,"Sox6, Plekha7"
F34,GBS,"Locomotor test day2, total distance travelled in 30min (cm)",8,chr8:17410225,17410225,5.65E-06,5.248,0.17,0.42,0.09,Csmd1
F34,GBS,Retic parameters concentration of hemoglobin in reticulocytes (pg),8,chr8:128524048,128524048,3.01E-06,5.521,0.255,-0.354,0.075,"Nrp1, Itgb1, Ccdc7b"
F34,GBS,"Retic parameters concentration of hemoglobin in reticulocytes, repeat  (pg)",8,chr8:128524048,128524048,1.04E-05,4.983,0.471,-0.3,0.068,"Nrp1, Itgb1, Ccdc7b"
F34,GBS,Quadriceps femoris muscle weight (mg),8,chr8:128571869,128571869,1.32E-06,5.879,0.531,-0.197,0.04,"Nrp1, Itgb1, Ccdc7b"
F34,GBS,Routine CBC red blood cell distribution width (%),10,chr10:66602511,66602511,3.42E-08,7.466,0.671,-0.41,0.073,"Reep3, Jmjd1c, Nrbf2"
F34,GBS,Retic parameters cell hemoglobin distribution width (pg),10,chr10:99307553,99307553,3.30E-06,5.481,0.499,-0.284,0.06,Dusp6
F34,GBS,Retic parameters hemoglobin distribution width (g/dL),13,chr13:45281420,45281420,1.86E-06,5.73,0.45,0.261,0.054,"Dtnbp1, Mylip, Gmpr"
F34,GBS,Routine CBC hemoglobin distribution width (g/dL),16,chr16:70311614,70311614,5.81E-06,5.236,0.674,0.315,0.069,"Speer2, Gbe1"
F39-43,GBS,"Coat color, albino",7,chr7:87255156,87255156,3.37E-166,165.472,0.389,-0.624,0.016,Tyr
"F34, F39-43",GBS,"Locomotor test day 2, total distance travelled in 30min (cm)",1,chr1:40907532,40907532,2.02E-07,6.694,0.665,0.25,0.048,"Mfsd9, Tmem182"
"F34, F39-43",GBS,"Locomotor test day 1, total distance travelled in 30min (cm)",1,chr1:122537959,122537959,1.15E-05,4.939,0.293,-0.213,0.048,"Htr5b, Ddx18, Dpp10"
"F34, F39-43",GBS,Body weight,4,chr4:66866758,66866758,1.16E-08,7.936,0.403,-0.191,0.033,"Pappa, Trim32, Astn2, Tlr4"
"F34, F39-43",GBS,Body weight,6,chr6:80614725,80614725,6.17E-07,6.21,0.512,0.149,0.03,"Lrrtm4, Gcfc2"
"F34, F39-43",GBS,"Coat color, albino",7,chr7:87665727,87665727,3.09E-274,273.5100415,0.592,0.596,0.012,Tyr
